# Supplementary material for: Liver Fibrosis Scoring Systems as Novel Tools for Predicting Cardiovascular Outcomes in Patients Following Elective Percutaneous Coronary Intervention
Source: PubMed Central journal article supplement — J Am Heart Assoc. 2021 Jan 28;10(3):e018869. doi: 10.1161/JAHA.120.018869 (PMC7955446; doi:10.1161/jaha.120.018869), 2021-01-28
Supplement: JAH3-10-e018869-s001.pdf [file JAH3-10-e018869-s001.pdf]

# **SUPPLEMENTAL MATERIAL**

**Table S1. Definition of liver fibrosis scores and relative cutoffs.**

|                            | <b>Algorithm</b>                                                                                                                                                                                                                                                       | <b>Cut-offs</b>                                                        |
|----------------------------|------------------------------------------------------------------------------------------------------------------------------------------------------------------------------------------------------------------------------------------------------------------------|------------------------------------------------------------------------|
| NAFLD Fibrosis Score (NFS) | $-1.675 + (0.037 \times \text{age [years]}) + (0.094 * \text{BMI [Kg/m}^2\text{]}) + (1.13 \times \text{IFG/DM [yes=1, no=0]}) +$<br>$(0.99 \times \text{AST/ALT ratio}) - (0.013 \times \text{platelet count [10}^9\text{/L]}) - (0.66 \times \text{albumin [g/dL]})$ | Low risk <-1.455<br>Intermediate risk -1.455-0.675<br>High risk >0.675 |
| Fibrosis-4 (FIB-4)         | $(\text{age [years]} \times \text{AST [IU/L]}) / (\text{platelet count [10}^9\text{/L]} \times \sqrt{\text{ALT [IU/L]}})$                                                                                                                                              | Low risk <1.3<br>Intermediate risk 1.3-2.67<br>High risk >2.67         |
| BARD                       | BMI $\geq 28$ kg/m <sup>2</sup> = 1 point, AST to ALT ratio $\geq 0.8$ = 2 points, DM = 1 point                                                                                                                                                                        | Low risk 0-1<br>Intermediate risk 2<br>High risk 3-4                   |
| AST/ALT ratio              | AST (IU/L)/ALT (IU/L)                                                                                                                                                                                                                                                  | Low risk <0.8<br>Intermediate risk 0.8-1.0<br>High risk >1.0           |
| Forns score                | $7.811 - 3.131 \times \log(\text{platelet count [10}^9\text{/L]}) + 0.781 \times \log(\text{GGT [IU/L]}) + 3.467 \times \log(\text{age [year]})$<br>$- 0.014 \times \text{total cholesterol (mg/dL)}$                                                                  | Low risk <4.2<br>Intermediate risk 4.2-6.9                             |

---

|                                    |                                                                                                                                                                                                                                                                          |                                                                |
|------------------------------------|--------------------------------------------------------------------------------------------------------------------------------------------------------------------------------------------------------------------------------------------------------------------------|----------------------------------------------------------------|
|                                    |                                                                                                                                                                                                                                                                          | High risk >6.9                                                 |
| GGT platelet ratio (GPR)           | GGT/platelet count (10 <sup>9</sup> /L)                                                                                                                                                                                                                                  | Tertiles by gender                                             |
| AST to platelet ratio index (APRI) | AST (IU/L)/AST (the upper limit of normal, ULN) × 100 / platelet count (10 <sup>9</sup> /L)                                                                                                                                                                              | Low risk <0.5<br>Intermediate risk 0.5-1.5<br>High risk >1.5   |
| HUI                                | $y = 3.148 + 0.167 \times \text{BMI} [\text{kg}/\text{m}^2] + 0.088 \times \text{TBil} [\text{umol}/\text{L}] - 0.151 \times \text{albumin} [\text{g}/\text{L}] - 0.019 \times \text{platelet count} [\times 10^9/\text{L}]$ , HUI score = $\exp. (y) / (1 + \exp. (y))$ | Low risk <0.15<br>Intermediate risk 0.15-0.5<br>High risk >0.5 |

---

NAFLD, non-alcoholic fatty liver disease; BMI, body mass index; IFG, impaired fasting glucose; DM, diabetes mellitus; AST, aspartate aminotransferase; ALT, alanine aminotransferase; BARD, Body Mass Index, AST/ALT ratio, Diabetes score; GGT, gamma glutamyltransferase.

**Table S2. Procedural characteristics of patients with and without primary endpoints.**

| Variables                       | Overall<br>(n=4003) | Events<br>(n=315) | Non-events<br>(n=3688) |
|---------------------------------|---------------------|-------------------|------------------------|
| <b>Number of lesion vessels</b> |                     |                   |                        |
| Single-vessel, n (%)            | 1019 (25.5)         | 64 (20.4)         | 955 (25.9)             |
| Double-vessel, n (%)            | 1369 (34.2)         | 97 (30.8)         | 1272 (34.5)            |
| Multi-vessel, n (%)             | 1613 (40.3)         | 153 (48.6)        | 1460 (39.6)            |
| <b>Target vessels</b>           |                     |                   |                        |
| LM, n (%)                       | 186 (4.6)           | 16 (5.1)          | 170 (4.6)              |
| LAD, n (%)                      | 2657 (66.4)         | 186 (59.2)        | 2471 (67.0)            |
| LCX, n (%)                      | 1642 (41.0)         | 163 (51.8)        | 1479 (40.1)            |
| RCA, n (%)                      | 1942 (48.5)         | 157 (49.8)        | 1785 (48.4)            |
| Grafts, n (%)                   | 49 (1.2)            | 5 (1.6)           | 44 (1.2)               |
| Number of target vessels        | 1.20±0.44           | 1.13±0.43         | 1.20±0.44              |
| Number of stents implanted      | 1.82±1.01           | 1.77±0.94         | 1.83±1.01              |
| Bifurcation lesion, n (%)       | 1540 (38.5)         | 127 (40.3)        | 1413 (38.3)            |
| Occlusion lesion, n (%)         | 417 (10.4)          | 41 (13.0)         | 376 (10.2)             |
| In-stent restenosis, n (%)      | 184 (4.6)           | 14 (4.5)          | 170 (4.6)              |
| Number of pre-dilations         | 2 (1-4)             | 2 (1-5)           | 2 (1-4)                |
| Number of post-dilations        | 4 (2-5)             | 4 (2-6)           | 4 (2-5)                |
| Total stent length, mm          | 40.09±20.58         | 41.73±26.41       | 40.07±19.97            |
| DES, n (%)                      | 3506 (87.6)         | 279 (88.7)        | 3227 (87.5)            |

Continuous values are summarized as mean ± SD, median (interquartile range) and categorical variables as number (percentage). DES, drug-eluting stent; LM, left main; LAD, Left anterior descending; LCX, left circumflex; RCA, right coronary artery.

**Table S3. Multivariate Cox regression analysis for the primary endpoints among patients following selective percutaneous coronary intervention.**

| Variables                | Hazard ratio (95% confidence interval) | <i>p</i> value |
|--------------------------|----------------------------------------|----------------|
| Age                      | 1.03 (1.02-1.05)                       | <0.001         |
| Male                     | 1.02 (0.68-1.55)                       | 0.914          |
| Current smoking          | 1.12 (0.77-1.63)                       | 0.545          |
| Alcohol consumption      | 0.80 (0.51-1.25)                       | 0.319          |
| Diabetes                 | 1.07 (0.68-1.70)                       | 0.763          |
| Hypertension             | 1.63 (1.10-2.41)                       | 0.015          |
| Systolic blood pressure  | 1.01 (0.99-1.01)                       | 0.327          |
| LDL-C                    | 0.97 (0.76-1.25)                       | 0.812          |
| HbA1c                    | 1.08 (0.90-1.30)                       | 0.428          |
| HsCRP                    | 1.04 (1.00-1.09)                       | 0.049          |
| Number of lesion vessels | 1.34 (1.08-1.67)                       | 0.008          |
| Baseline statin use      | 0.65 (0.46-0.90)                       | 0.010          |
| AST/ALT ratio (per 1-SD) | 1.15 (1.04-1.27)                       | 0.009          |

AST, aspartate aminotransferase; ALT, alanine aminotransferase; HbA1c, glycosylated hemoglobin; HsCRP, high sensitivity C-reactive protein; LDL-C, low-density lipoprotein cholesterol; SD, standard deviation.

**Table S4. Sensitivity analysis of the association of per 1-SD (per 1-point for BARD) increase of liver fibrosis scores with hard endpoint events by separate adjustment for each of the other significant variables.**

| Adjustment variable      | Hazard ratio (95% confidence interval) |                   |                   |                   |
|--------------------------|----------------------------------------|-------------------|-------------------|-------------------|
|                          | NFS                                    | FIB-4             | BARD              | AST/ALT           |
| Age                      | -                                      | -                 | 1.22 (1.07-1.40)† | 1.09 (1.00-1.19)* |
| Sex                      | 1.27 (1.01-1.59)*                      | 1.08 (1.01-1.15)* | 1.30 (1.14-1.48)‡ | 1.13 (1.03-1.23)† |
| Hypertension             | 1.56 (1.31-1.86)‡                      | 1.09 (1.03-1.16)† | 1.30 (1.15-1.48)‡ | 1.16 (1.06-1.26)† |
| Diabetes                 | -                                      | 1.08 (1.01-1.24)* | -                 | 1.15 (1.06-1.24)† |
| Current smoking          | 1.53 (1.28-1.84)‡                      | 1.08 (1.01-1.15)* | 1.31 (1.15-1.49)‡ | 1.14 (1.05-1.24)† |
| SBP                      | 1.58 (1.24-2.01)‡                      | 1.08 (1.02-1.14)† | 1.28 (1.11-1.46)‡ | 1.14 (1.01-1.29)* |
| HbA1c                    | 1.53 (1.28-1.83)‡                      | 1.08 (1.01-1.15)* | 1.31 (1.15-1.49)‡ | 1.15 (1.06-1.24)† |
| HsCRP                    | 1.54 (1.30-1.83)‡                      | 1.07 (1.02-1.13)† | 1.31 (1.16-1.49)‡ | 1.13 (1.04-1.23)† |
| Number of lesion vessels | 1.53 (1.29-1.81)‡                      | 1.07 (1.01-1.14)* | 1.31 (1.15-1.49)‡ | 1.14 (1.05-1.23)† |
| Baseline statin use      | 1.53 (1.29-1.82)‡                      | 1.07 (1.01-1.14)* | 1.40 (1.22-1.60)‡ | 1.14 (1.05-1.24)† |

AST, Aspartate aminotransferase; ALT, alanine aminotransferase; BARD, Body Mass Index, AST/ALT ratio, Diabetes score; FIB-4, fibrosis-4; NFS, non-alcoholic fatty liver disease fibrosis score; HbA1c, glycosylated hemoglobin; HsCRP, high-sensitivity C-reactive protein; SBP, systolic blood pressure.

**Table S5. Adjusted hazard ratios of each primary cardiovascular event separately according to baseline liver fibrosis scores.**

| Score                | Adjusted Hazard ratio (95% confidence interval) |                   |                   |                   |
|----------------------|-------------------------------------------------|-------------------|-------------------|-------------------|
|                      | All-cause death                                 | CVD death         | Non-fatal MI      | Ischemic stroke   |
| <b>NFS</b>           |                                                 |                   |                   |                   |
| <-1.455              | 1.00                                            | 1.00              | 1.00              | 1.00              |
| ≥-1.455              | 3.50 (2.01-6.11)‡                               | 2.56 (1.33-4.93)† | 2.83 (1.71-4.70)* | 1.23 (0.72-2.10)  |
| Per 1-SD             | 2.10 (1.76-2.51)‡                               | 2.26 (1.82-2.82)‡ | 1.45 (1.17-1.80)† | 1.14 (0.94-1.39)  |
| <b>FIB-4</b>         |                                                 |                   |                   |                   |
| <1.3                 | 1.00                                            | 1.00              | 1.00              | 1.00              |
| ≥1.3                 | 2.18 (1.56-3.05)‡                               | 2.27 (1.41-3.66)† | 1.67 (1.01-2.76)* | 1.55 (1.02-2.37)* |
| Per 1-SD             | 1.09 (1.03-1.16)†                               | 1.09 (0.98-1.21)  | 1.09 (0.94-1.26)  | 1.04 (0.94-1.16)  |
| <b>BARD</b>          |                                                 |                   |                   |                   |
| 0-1                  | 1.00                                            | 1.00              | 1.00              | 1.00              |
| 2-4                  | 1.78 (1.24-2.56)†                               | 2.36 (1.38-4.05)† | 1.50 (1.05-2.14)* | 1.17 (0.93-1.48)  |
| Per 1-point          | 1.47 (1.25-1.74)‡                               | 1.84 (1.43-2.36)‡ | 1.25 (1.07-1.48)† | 1.08 (0.97-1.20)  |
| <b>AST/ALT ratio</b> |                                                 |                   |                   |                   |
| <0.8                 | 1.00                                            | 1.00              | 1.00              | 1.00              |
| ≥0.8                 | 2.76 (1.52-5.01)†                               | 2.45 (1.43-4.21)† | 1.55 (1.08-2.21)* | 1.13 (0.89-1.43)  |
| Per 1-SD             | 1.19 (1.01-1.41)*                               | 1.31 (1.18-1.45)‡ | 1.10 (0.92-1.30)  | 1.02 (0.91-1.14)  |

The adjusted model included age, sex, current smoking, current drinking, diabetes, hypertension, systolic

blood pressure, low-density lipoprotein cholesterol, glycosylated hemoglobin, high-sensitivity C-

reactive

protein, number of lesion vessels, and baseline statin use, other than the variables included in the score formula. AST, Aspartate aminotransferase; ALT, alanine aminotransferase; BARD, Body Mass Index, AST/ALT ratio, Diabetes score; FIB-4, fibrosis-4; NFS, non-alcoholic fatty liver disease fibrosis score.

\* $p < 0.05$ ; †,  $p < 0.01$ .



**Table S6. C-statistic of LFSs for predicting primary endpoints in patients after selective PCI.**

|                                | C-statistic<br>(95% CI) | $\Delta$ C-statistic<br>(95% CI) | <i>p</i> value |
|--------------------------------|-------------------------|----------------------------------|----------------|
| Original model                 | 0.651 (0.588-0.714)     |                                  |                |
| Original model + NFS           | 0.691 (0.637-0.746)     | 0.040 (0.009-0.080)              | 0.026          |
| Original model                 | 0.652 (0.615-0.690)     |                                  |                |
| Original model + FIB-4         | 0.689 (0.655-0.724)     | 0.037 (0.004-0.067)              | 0.022          |
| Original model                 | 0.688 (0.653-0.723)     |                                  |                |
| Original model + BARD          | 0.706 (0.672-0.741)     | 0.018 (0.007-0.034)              | 0.008          |
| Original model                 | 0.689 (0.654-0.724)     |                                  |                |
| Original model + AST/ALT ratio | 0.702 (0.668-0.737)     | 0.013 (-0.002-0.029)             | 0.094          |

Original model included included age, sex, current smoking, current drinking, diabetes, hypertension, systolic blood pressure, low-density lipoprotein cholesterol, glycosylated hemoglobin, high-sensitivity C-reactive protein, number of lesion vessels, and baseline statin use, other than the variables included in the score formula. AST, Aspartate aminotransferase; ALT, alanine aminotransferase; BARD, Body Mass Index, AST/ALT ratio, Diabetes score; FIB-4, fibrosis-4; LFSs, liver fibrosis scores; NFS, non-alcoholic fatty liver disease fibrosis score; PCI, percutaneous coronary intervention.

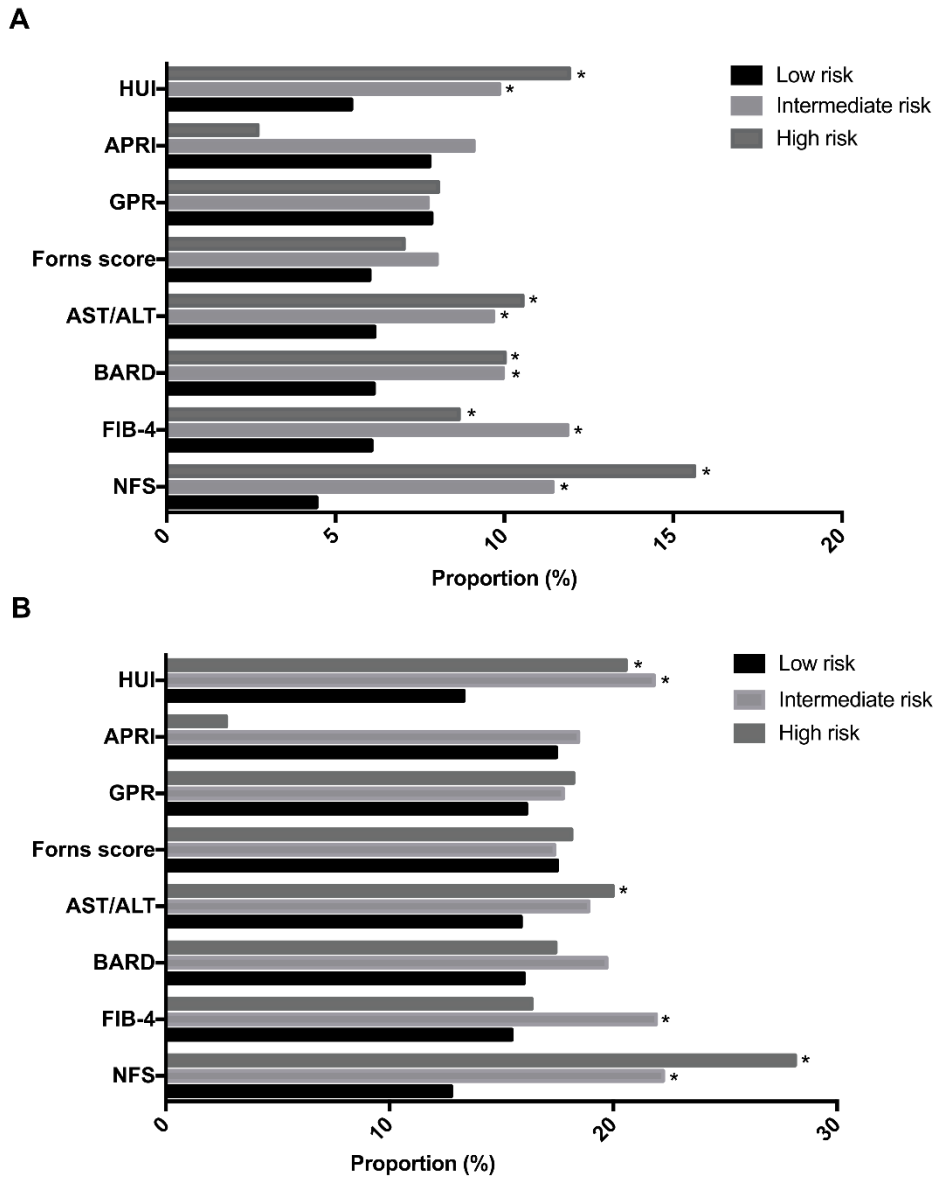

**Figure S1. The difference of cardiovascular events incidence according to the categorizations of LFSs. (A) Primary endpoint; (B) Secondary endpoint.** AST, Aspartate aminotransferase; ALT, alanine aminotransferase; APRI, AST to platelet ratio index; BARD, Body Mass Index, AST/ALT ratio, Diabetes score; FIB-4, fibrosis-4; GPR, gamma-glutamyltransferase platelet ratio; NFS, non-alcoholic fatty liver disease fibrosis score.

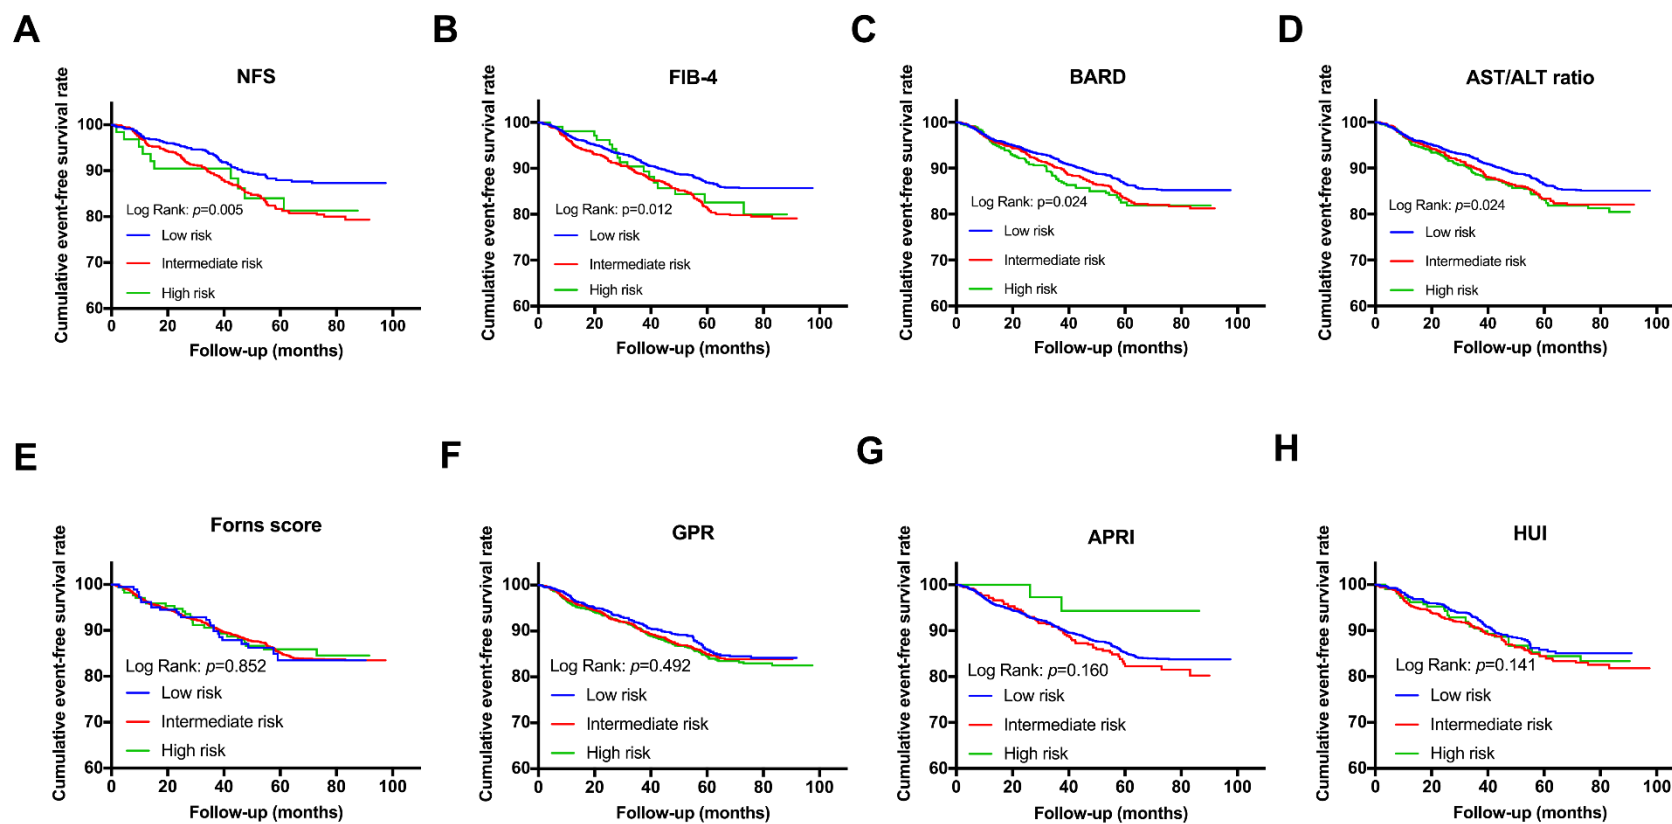

**Figure S2.** The cumulative event-free survival analysis for secondary endpoint according to baseline LFSs. (A) NFS; (B) FIB-4; (C) BARD; (D) AST/ALT ratio; (E) Forns score; (F) GPR; (G) APRI; (H) HUI. AST, Aspartate aminotransferase; ALT, alanine aminotransferase; APRI, AST to platelet ratio index; BARD, Body Mass Index, AST/ALT ratio, Diabetes score; FIB-4, fibrosis-4; GPR, gamma-glutamyltransferase

platelet ratio; NFS, non-alcoholic fatty liver disease fibrosis score.

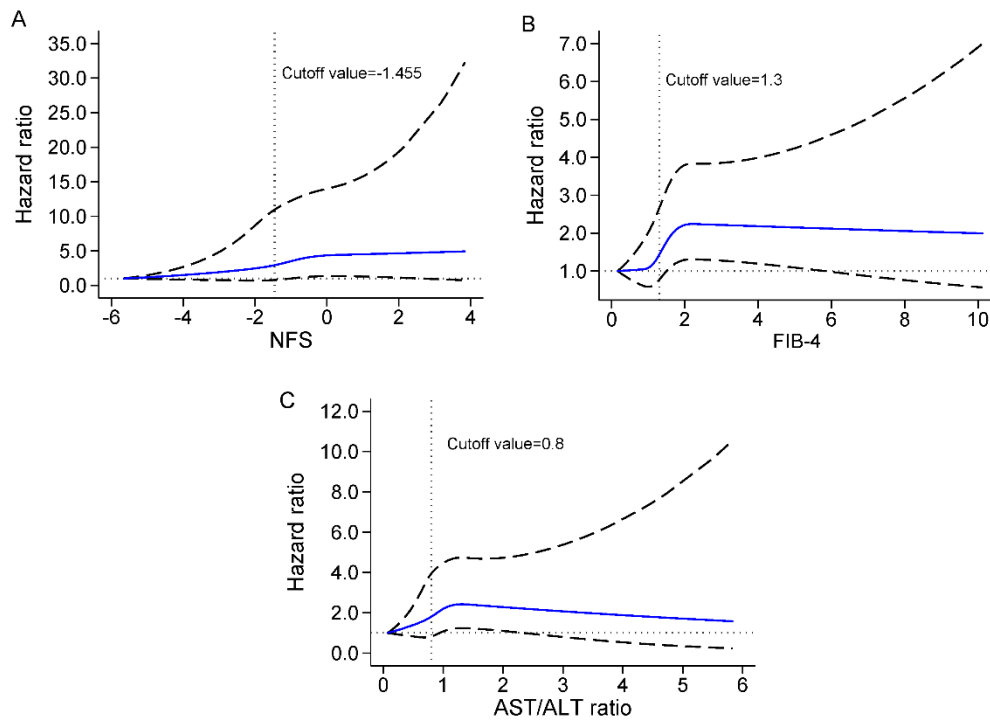

**Figure S3. Age- and sex-adjusted restricted cubic spline plot of liver fibrosis scores and risk of primary endpoint events. (A) NFS; (B) FIB-4 index; (C) AST/ALT ratio.** NFS, non-alcoholic fatty liver disease fibrosis score; FIB-4, fibrosis 4; AST, aspartate aminotransferase; ALT, alanine aminotransferase.

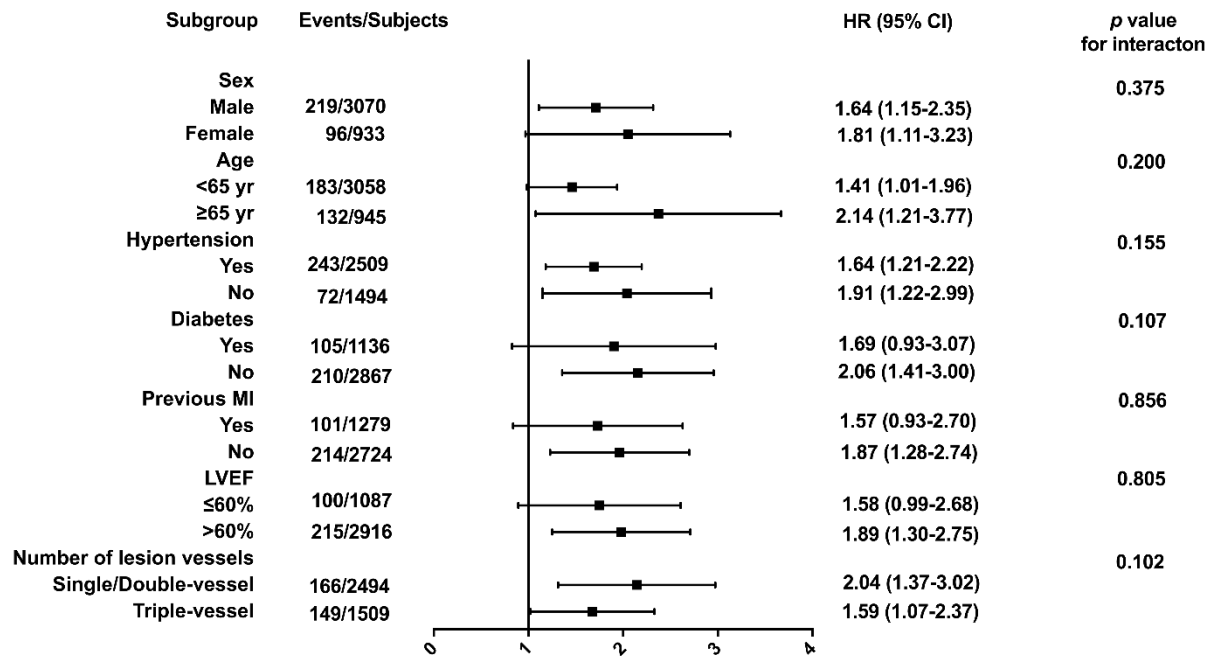

**Figure S4. Subgroup analyses of FIB-4 for predicting primary cardiovascular events.** CI, confidence interval; FIB-4, fibrosis 4; HR, hazard ratio; LVEF, left ventricular ejection fraction; MI, myocardial infarction.
